# Supplementary material for: Evolution of chronic diseases and multimorbidity clusters among the deceased in rural northeast South Africa (2012-2022): Insights from verbal autopsy data
Source: Research Square preprint supplement (doi:10.21203/rs.3.rs-8870259/v1), 2026-02-24
Supplement: Supplementary file 1 [file 0836c52c03abaada088c947c.docx]

**Evolution of chronic diseases and multimorbidity clusters among the deceased in rural northeast South Africa (2012-2022): Insights from verbal autopsy data.**

**Cyril Tamuka Chironda2*, Tobias Chirwa1**, **Farai Mlambo3**, **Rumbidzai Mupfuti2, Daniel Ohene-Kwofie2, Belinda J Njiro2, Jean Juste Harrisson Bashingwa2**, **Stephen Tollman2, Kathleen Kahn2, F. Xavier Gomez-Olive2, Chodziwadziwa. W. Kabudula2**

1Division of Epidemiology and Biostatistics, School of Public Health, Faculty of Health Sciences, University of the Witwatersrand, Johannesburg, South Africa.

2SAMRC/Wits Rural Public Health and Health Transitions Research Unit (Agincourt), School of Public Health, Faculty of Health Sciences, University of the Witwatersrand, Johannesburg, South Africa.

3Graduate School of Business Administration, Wits Business School, Faculty of Commerce, Law and Management, University of the Witwatersrand, Johannesburg, South Africa.

**Contents of this Supplement:**

List of Abbreviations

Author Initials and Full Names

Figure SUP 1: Disease Proportions Over Time by Age Group

Figure SUP 2: Disease Proportions Over Time by Age Group (Individual Disease Trends)

Figure SUP 3: Disease Proportions Over Time by Sex

Figure SUP 4: Disease Proportions Over Time by Sex (Individual Disease Trends)

Figure SUP 5: Multimorbidity Proportions Over Time by Age Group

Figure SUP 6: Multimorbidity Proportions Over Time by Sex

Figure SUP 7: Disease Combinations by Age for the periods 2012–2015 (a), 2016–2019 (b), and 2020–2022 (c)

Figure SUP 8: Disease Combination Upset Plots for Males and Females for the periods 2012–2015 (a), 2016–2019 (b), and 2020–2022 (c)

List of Abbreviations

| **Abbreviation** | **Full term** |
| --- | --- |
| **AIC** | **Akaike Information Criterion** |
| **ABIC** | **Adjusted Bayesian Information Criterion** |
| **BIC** | **Bayesian Information Criterion** |
| **CAIC** | **Consistent Akaike Information Criterion** |
| **CI** | **Confidence Interval** |
| **COPD** | **Chronic Obstructive Pulmonary Disease** |
| **CRVS** | **Civil Registration and Vital Statistics** |
| **HD** | **Heart Disease** |
| **HDSS** | **Health and Demographic Surveillance Site** |
| **HICs** | **High-Income Countries** |
| **HIV** | **Human Immunodeficiency Virus** |
| **HPT** | **Hypertension** |
| **KD** | **Kidney Disease** |
| **LCA** | **Latent Class Analysis** |
| **LMICs** | **Low- and Middle-Income Countries** |
| **NCDs** | **Non-Communicable Diseases** |
| **NOC** | **Number of Conditions** |
| **OR** | **Odds Ratio** |
| **PAM** | **Partitioning Around Medoids** |
| **SA** | **South Africa** |
| **TB** | **Tuberculosis** |
| **VA** | **Verbal Autopsy** |
| **WHO** | **World Health Organization** |

Author Initials

| **Initials** | **Full name** |
| --- | --- |
| **CC** | Cyril Tamuka Chironda |
| **TC** | Tobias Chirwa |
| **FM** | Farai Mlambo |
| **RM** | Rumbidzai Mupfuti |
| **BN** | Belinda J. Njiro |
| **FXGO** | F. Xavier Gomez-Olivé |
| **CWK** | Chodziwadziwa W. Kabudula |

**
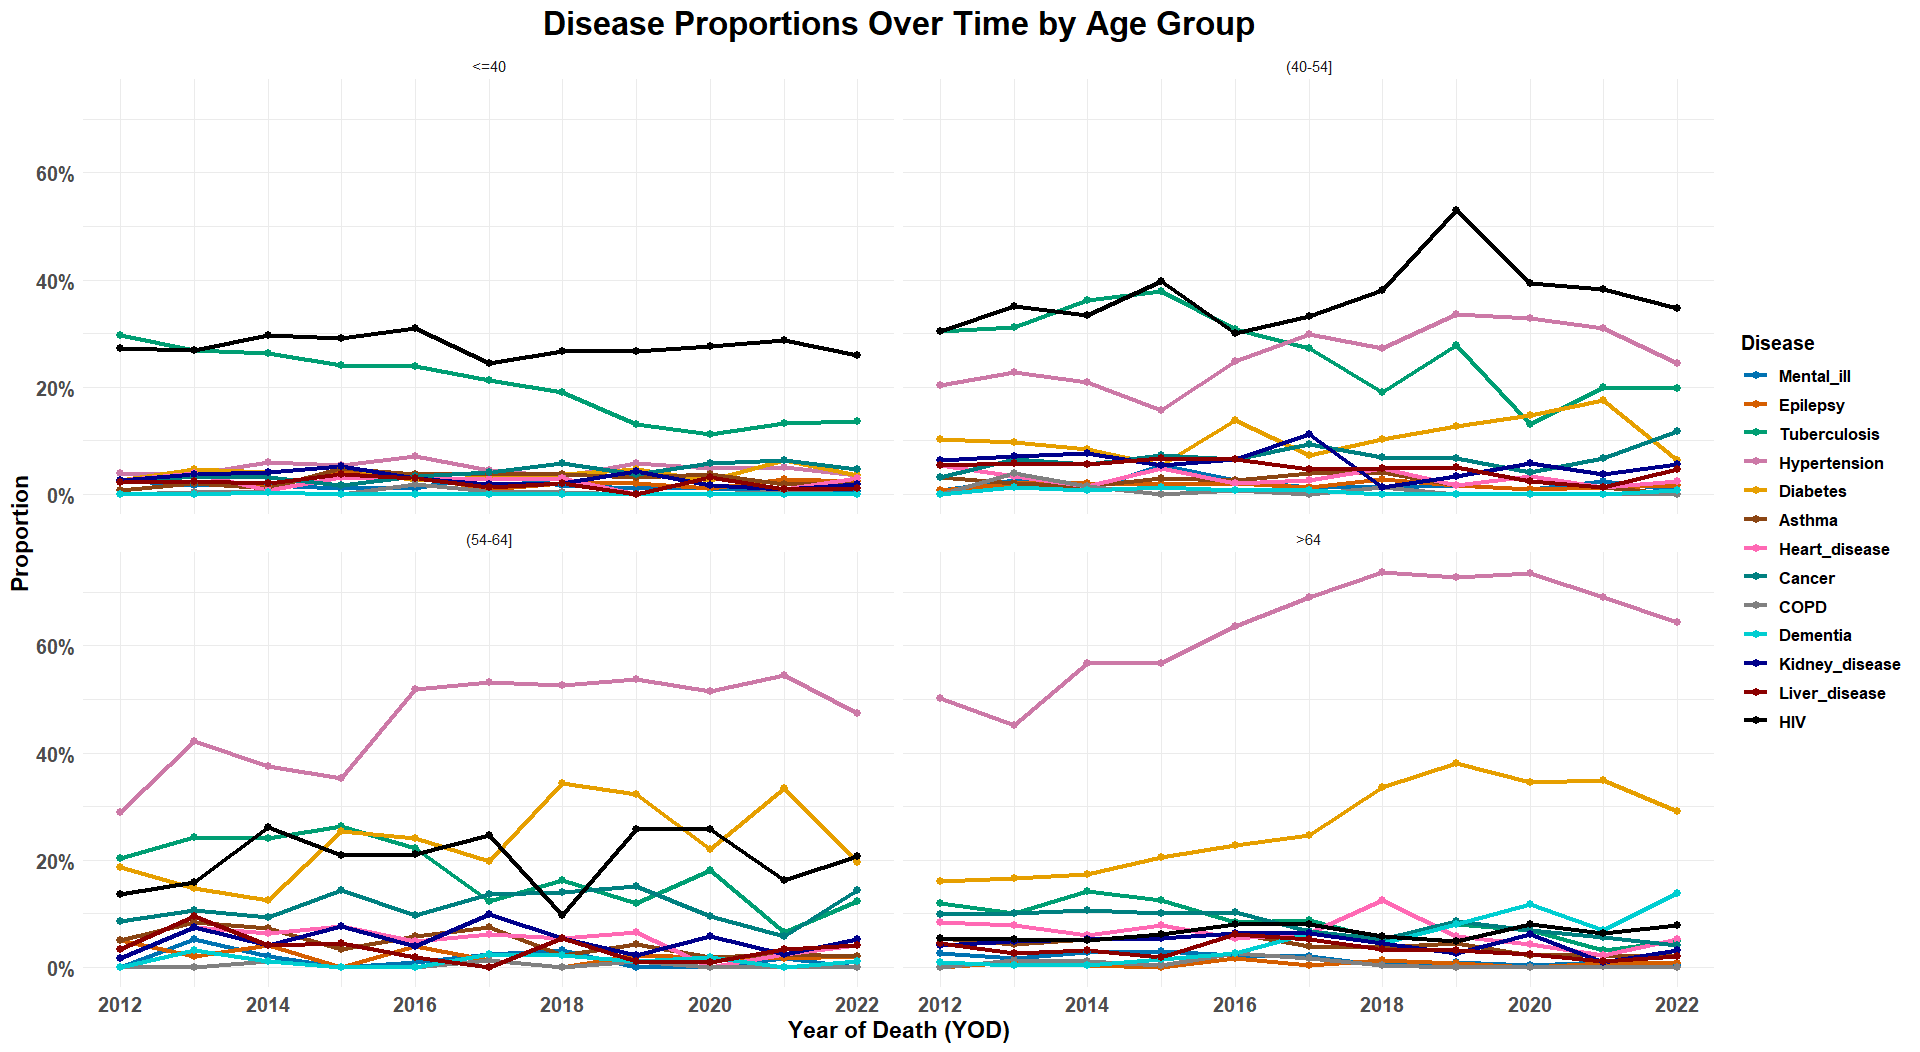
**

Figure SUP 1

**
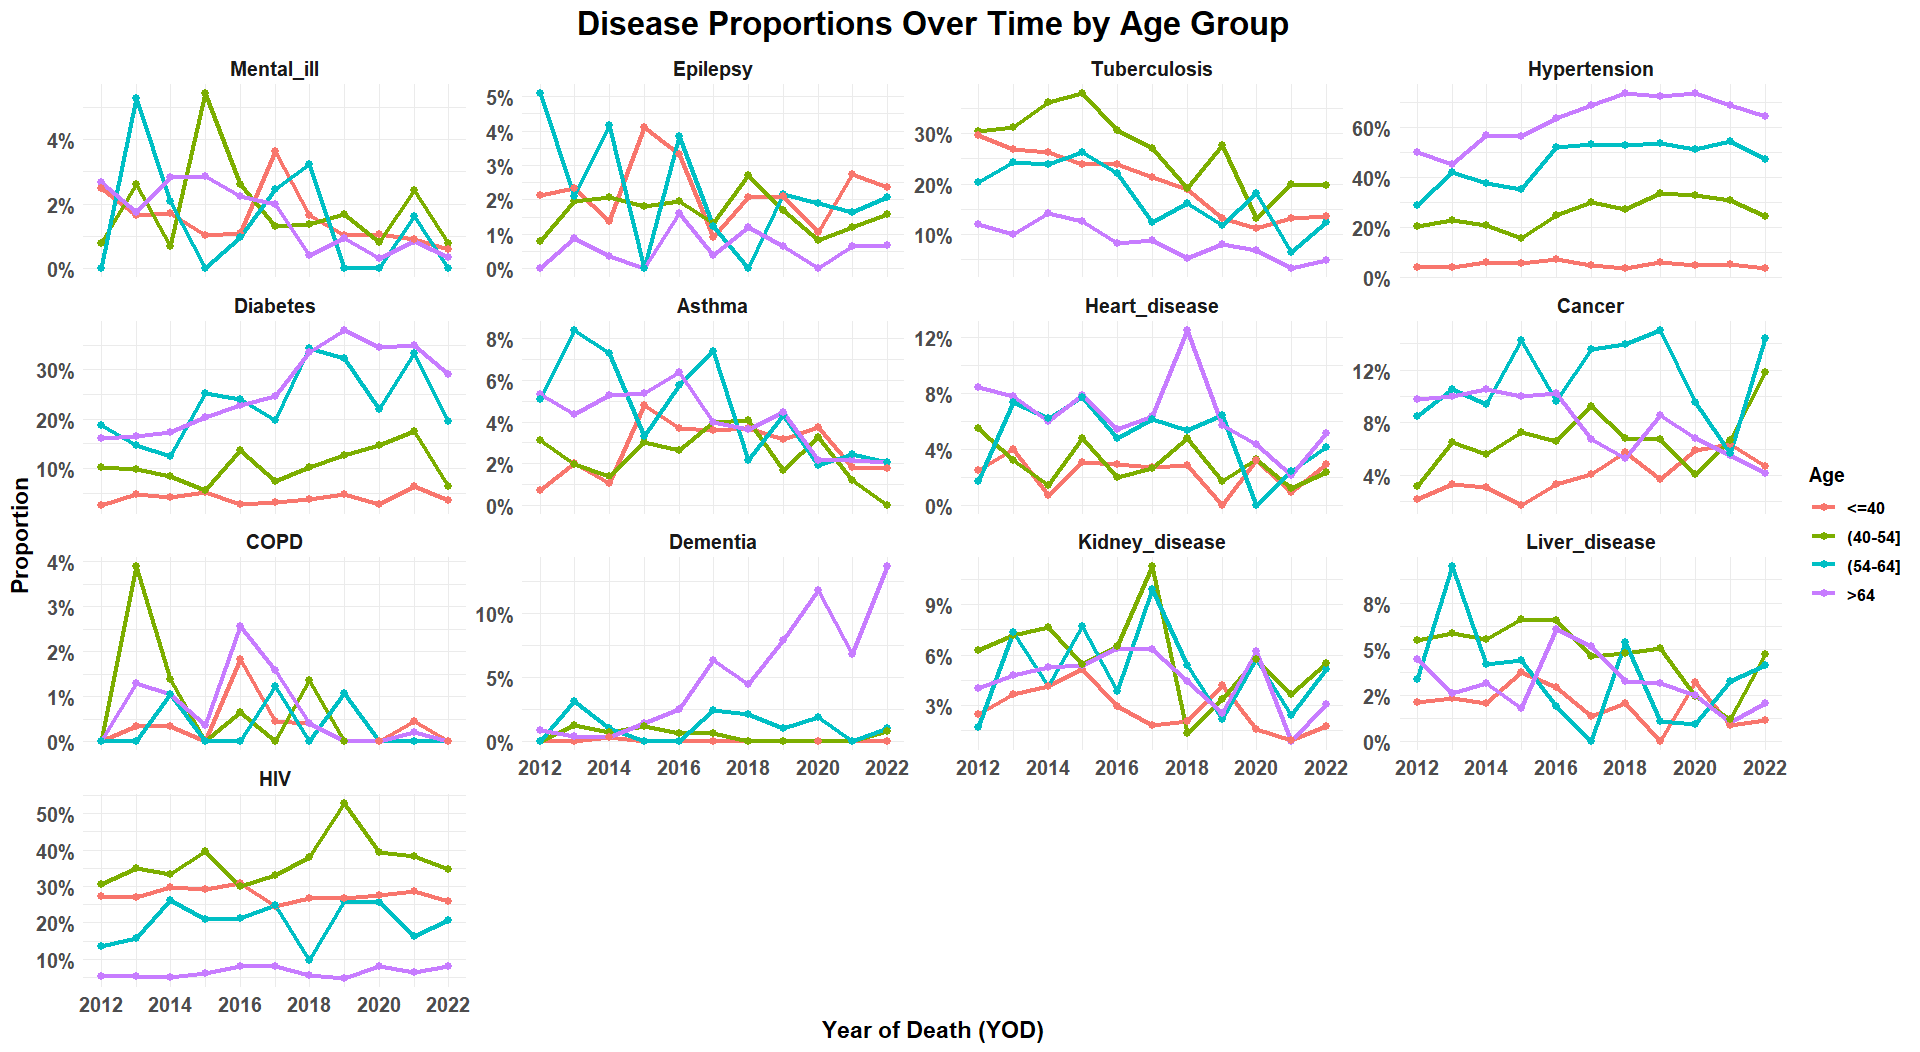
**

Figure SUP 2

**
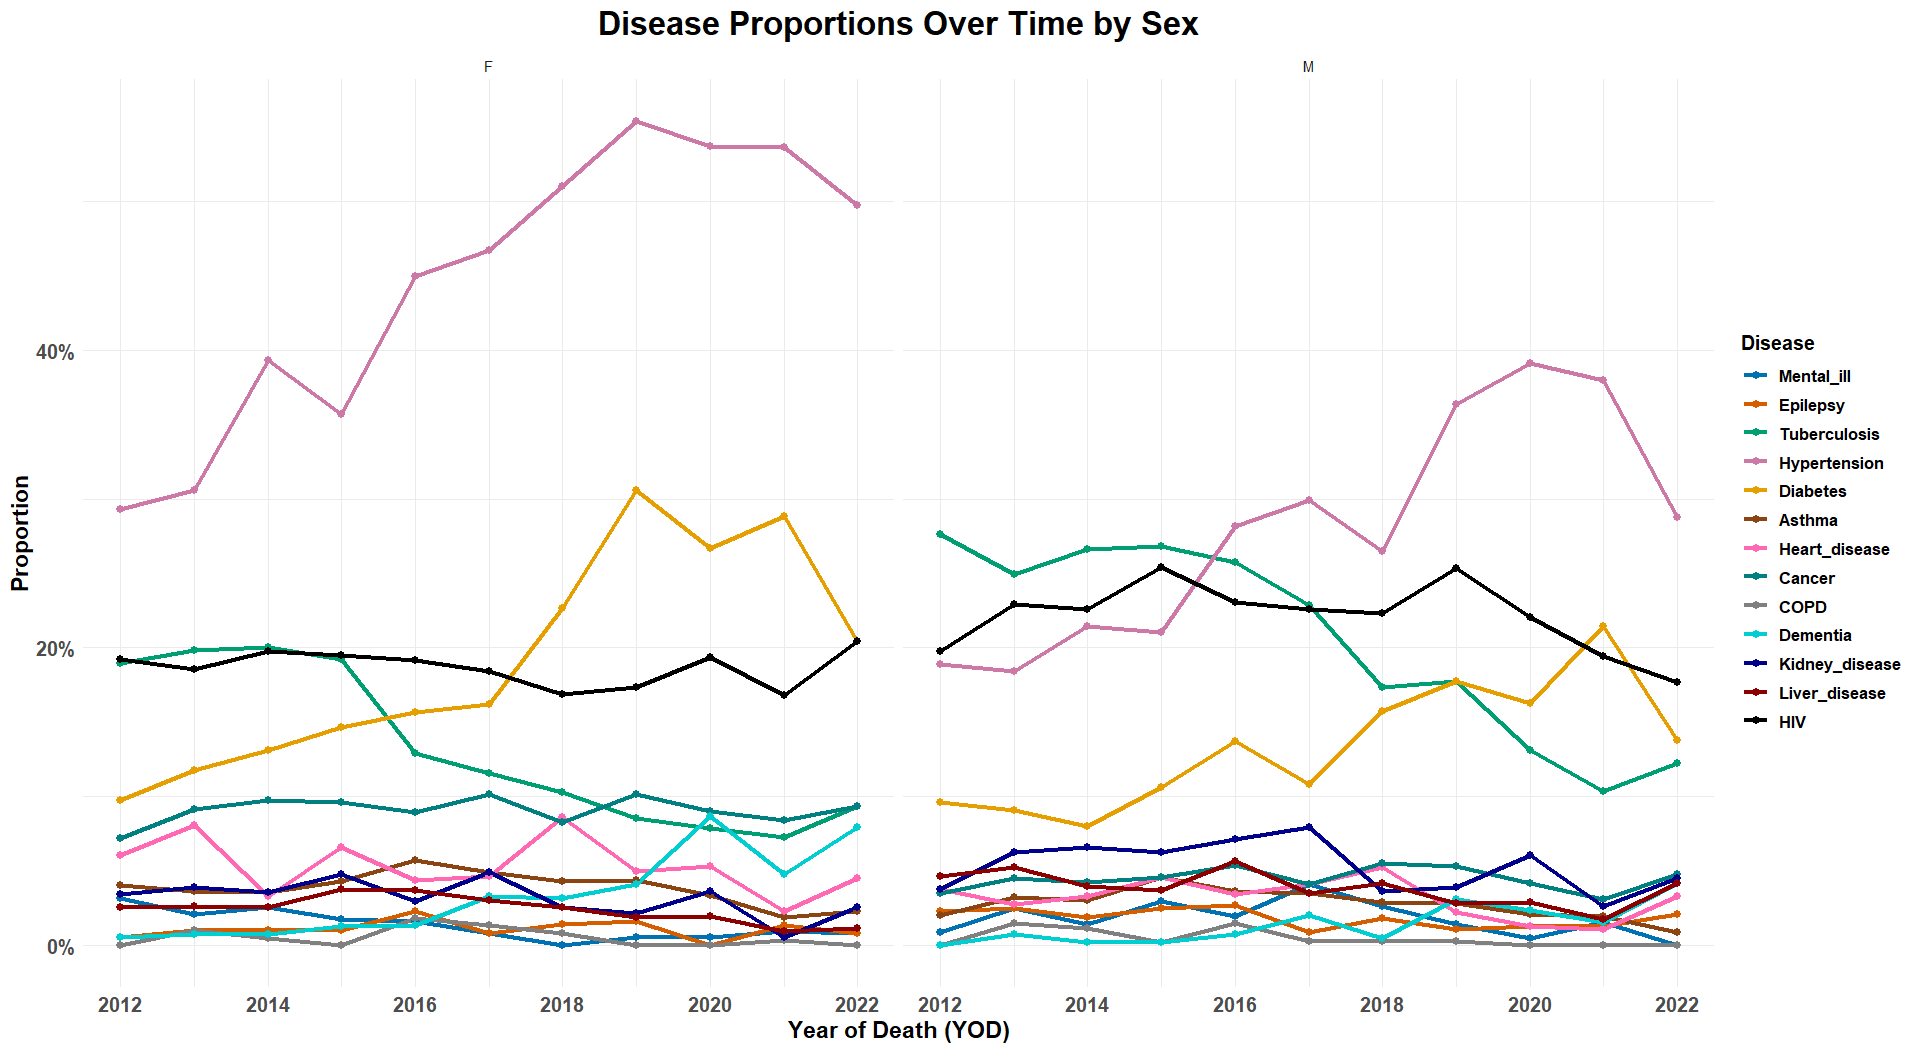
**

Figure SUP 3

**
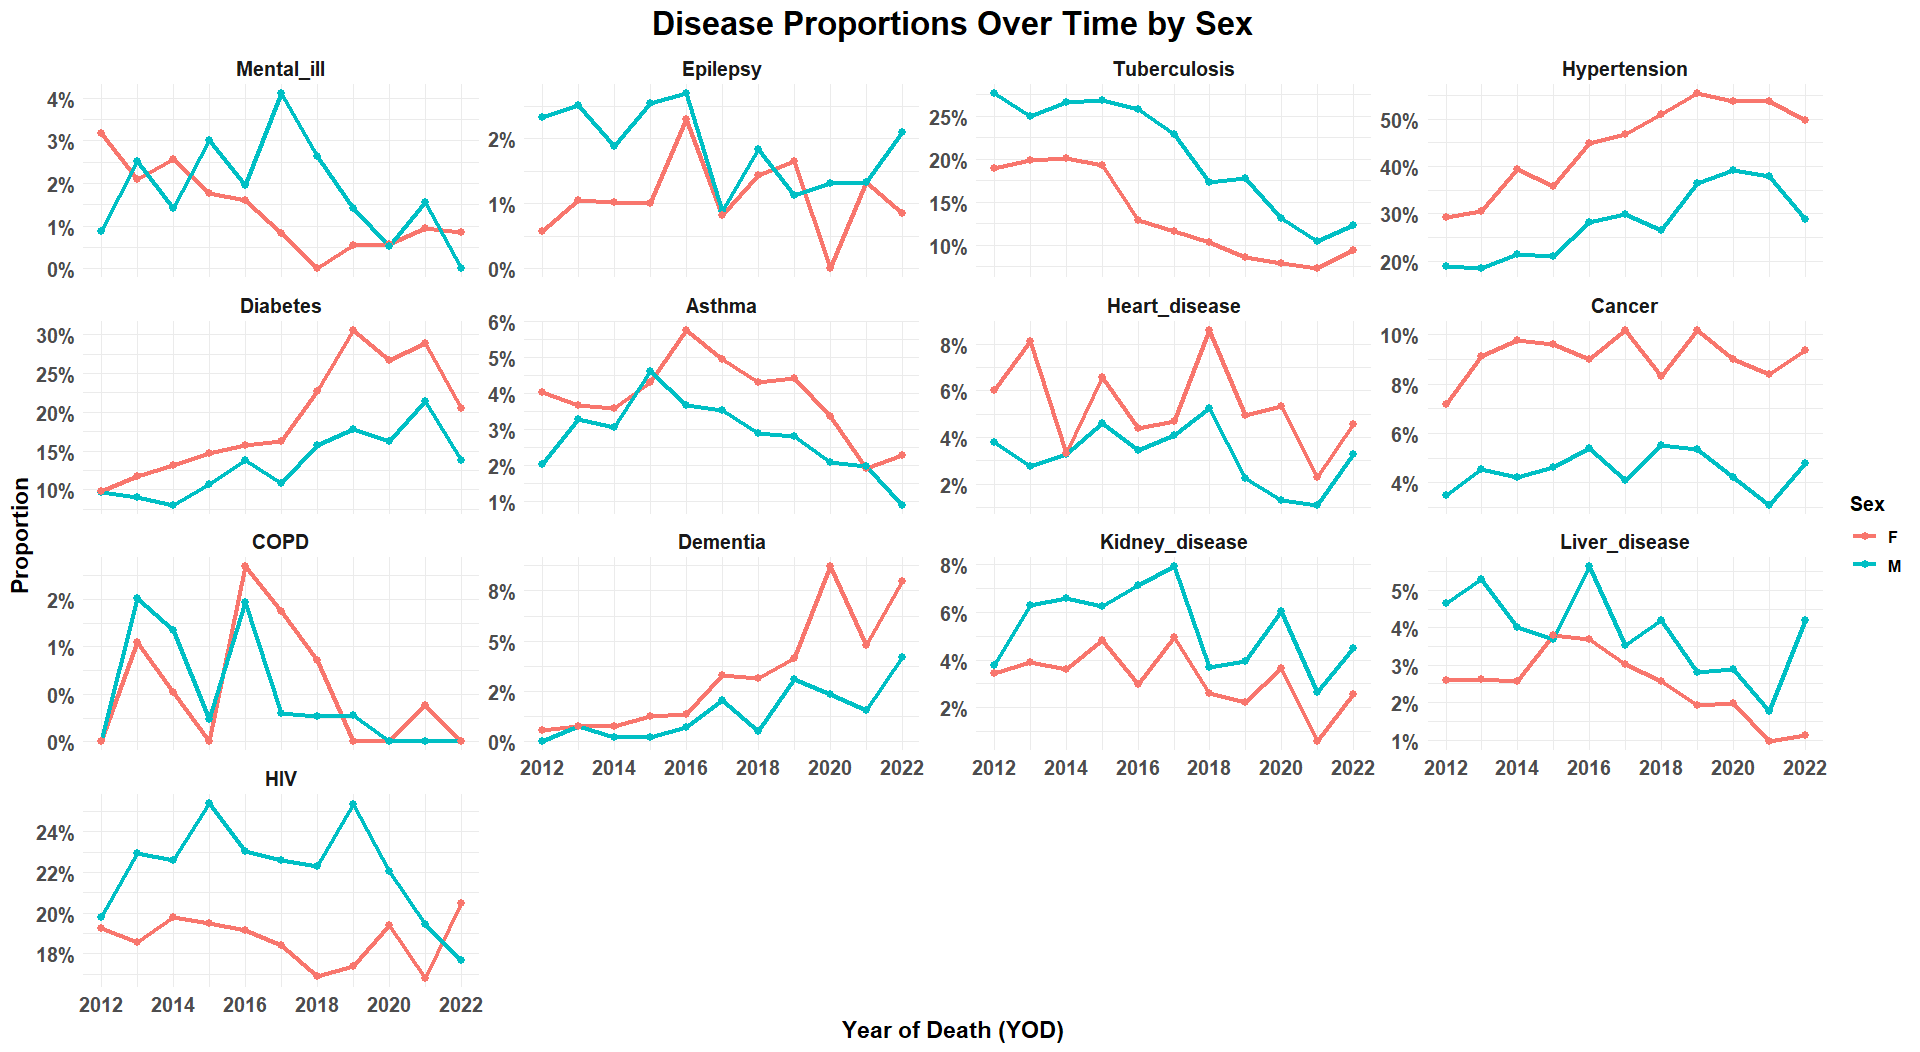
**

Figure SUP 4

**
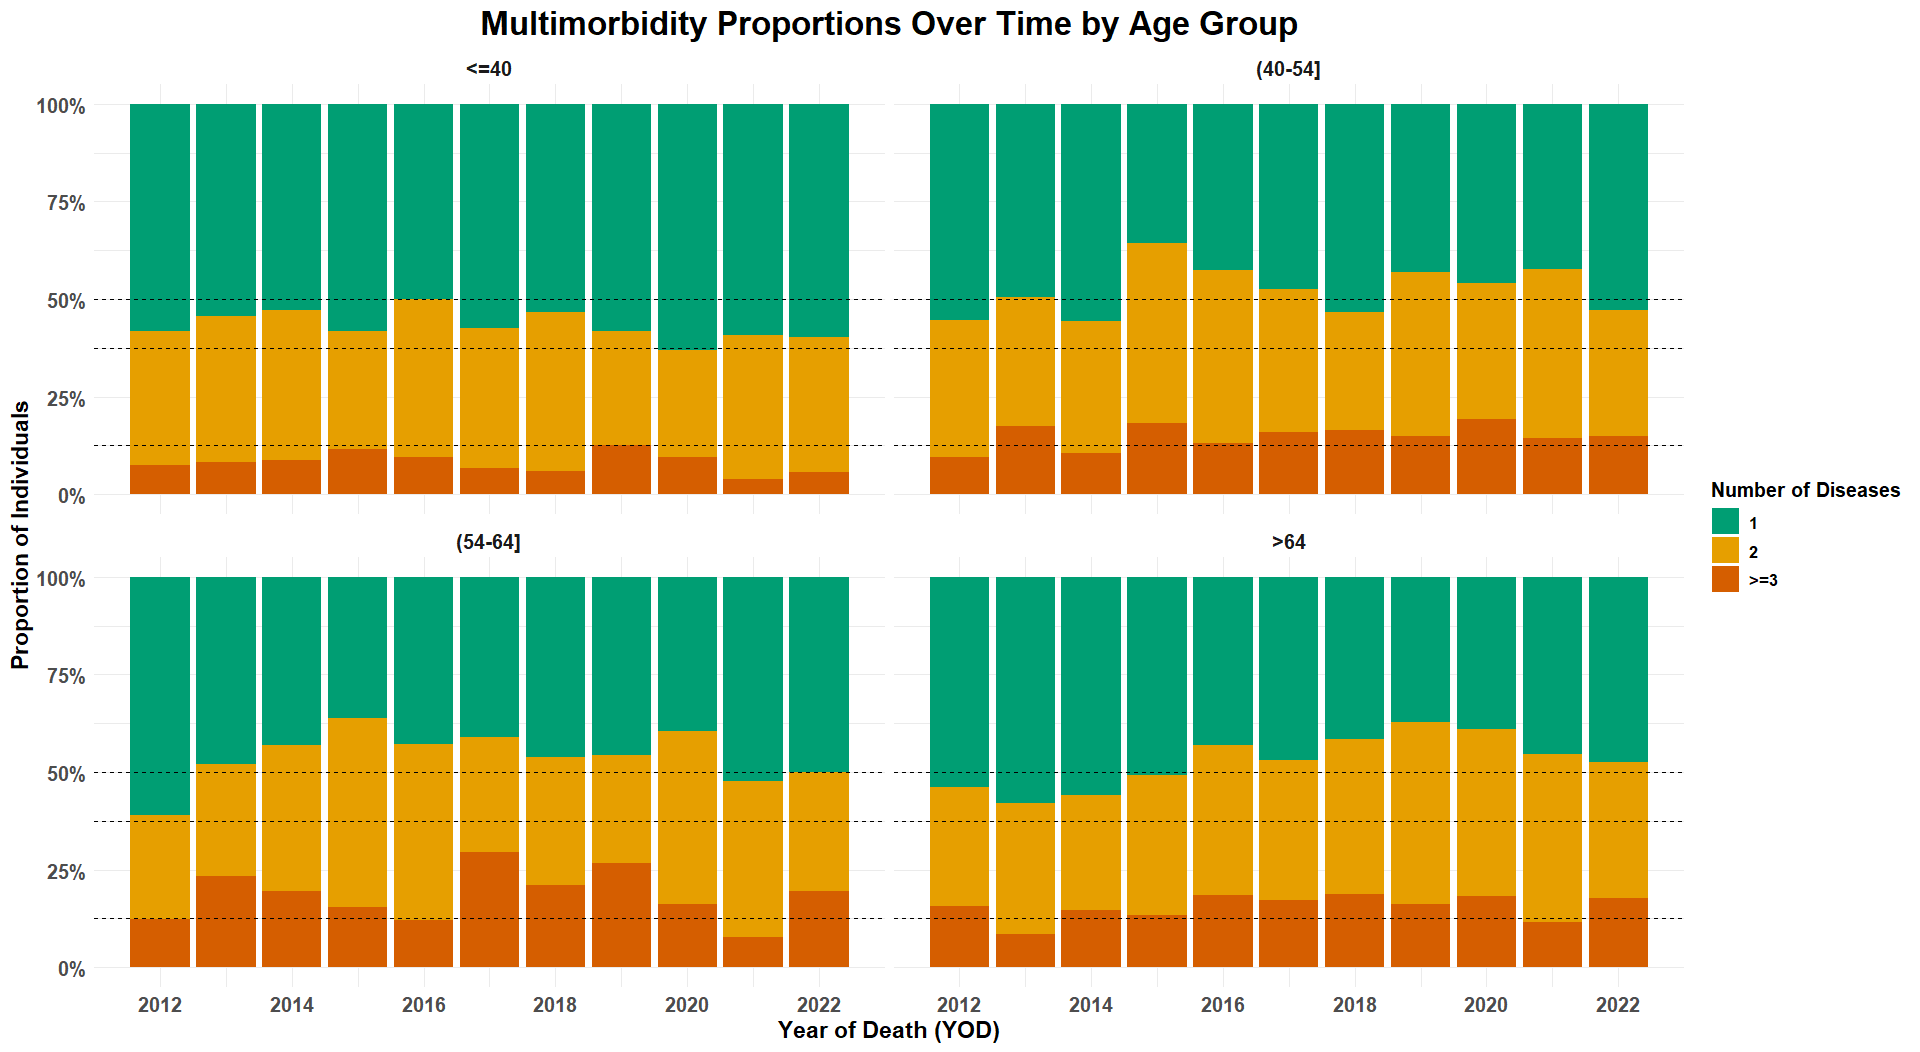
**

Figure SUP 5

**
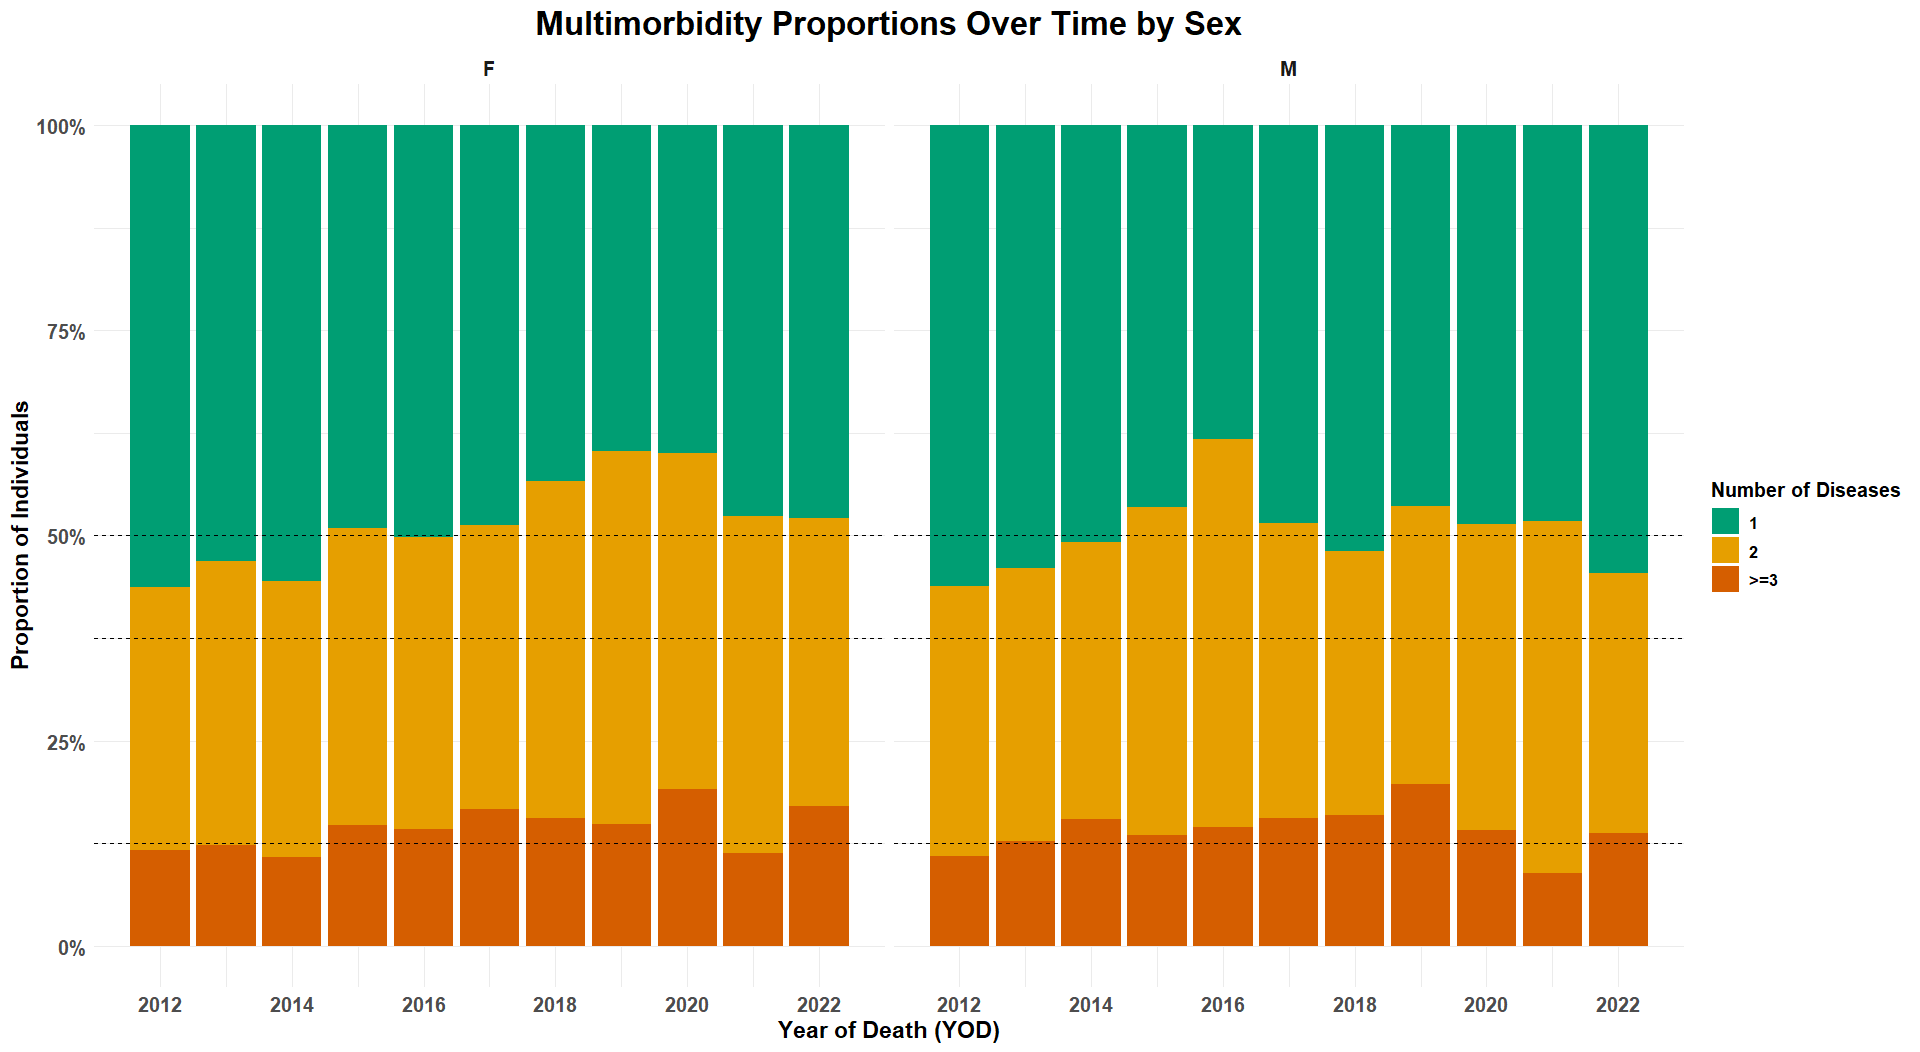
**

Figure SUP 6

**
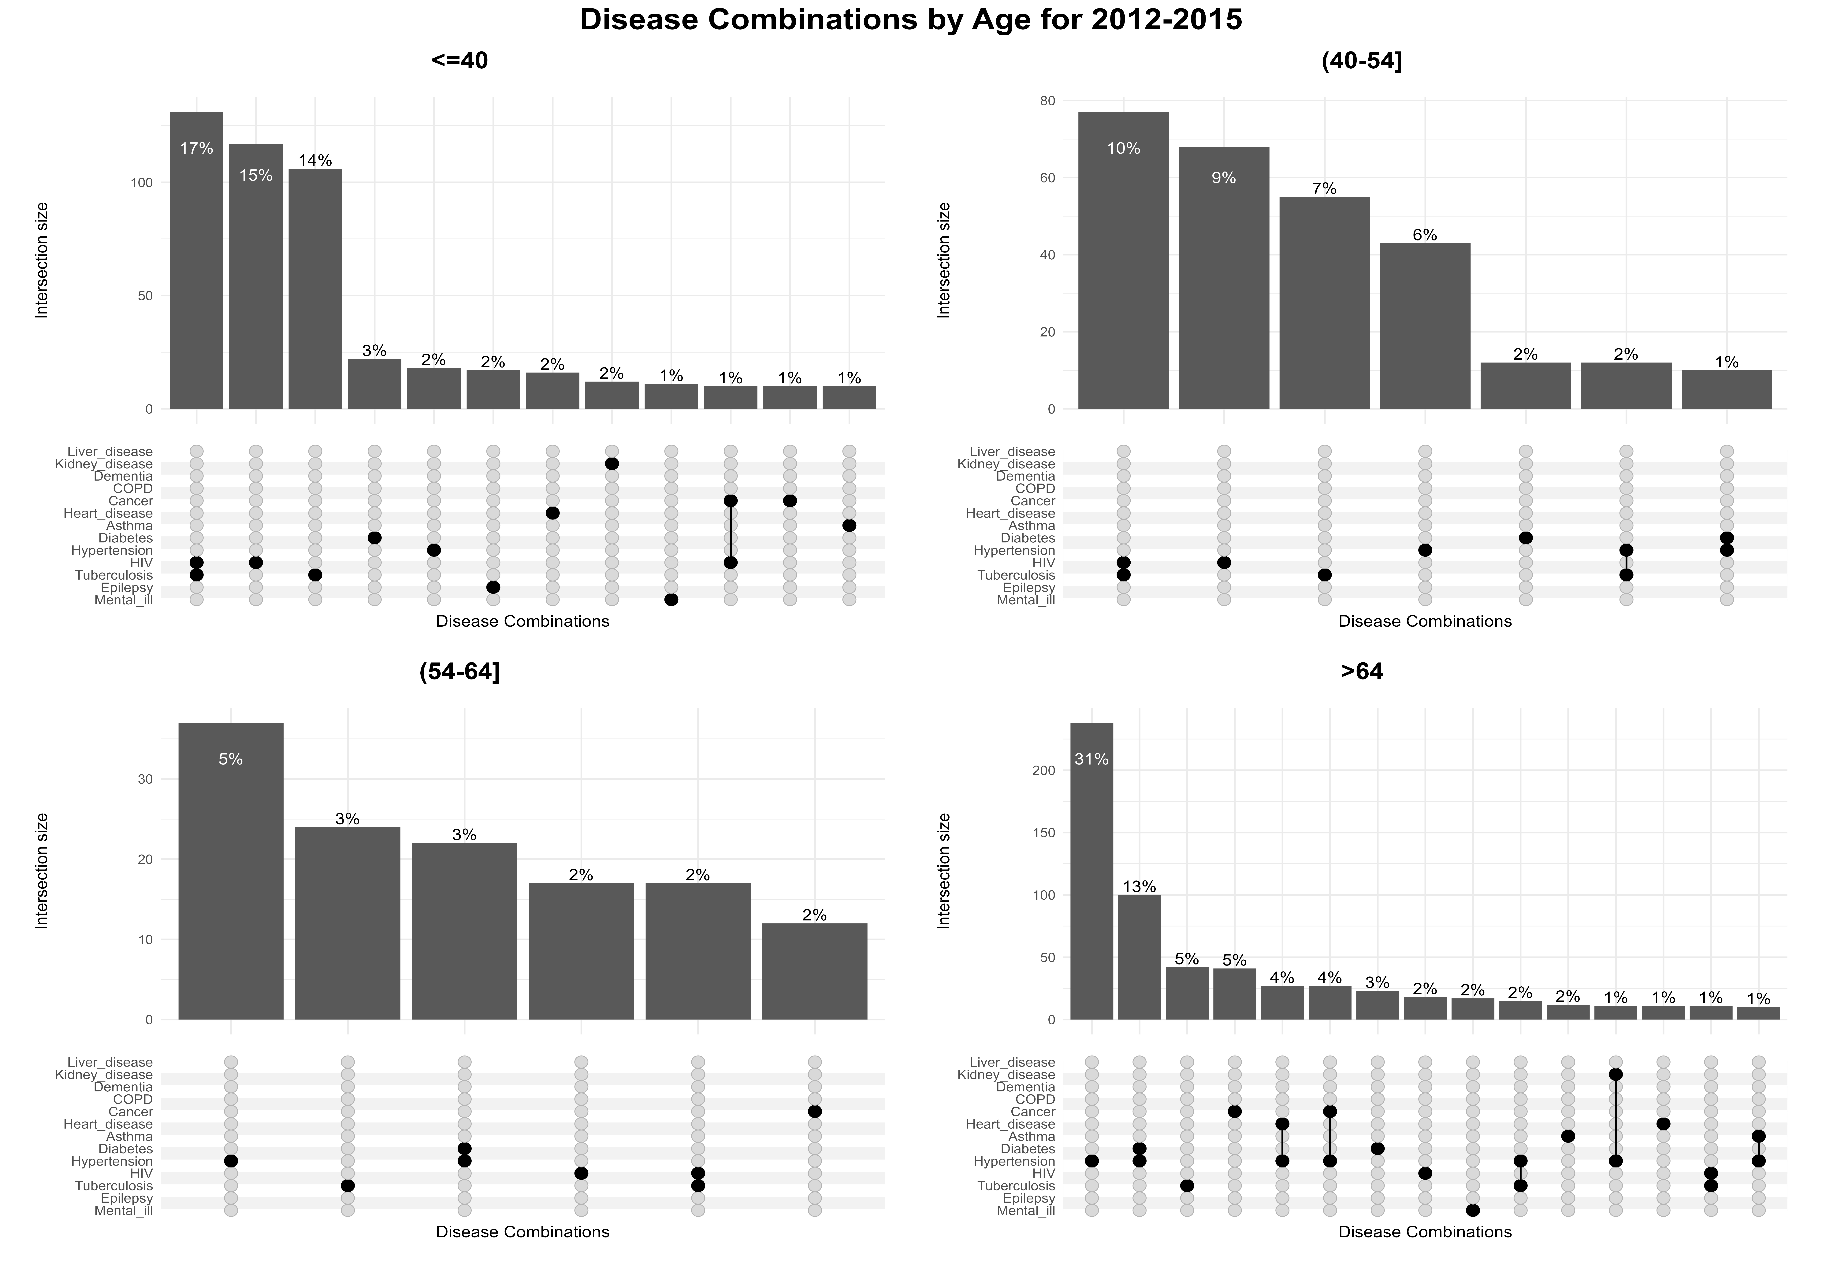
**

Figure SUP 7 a

**
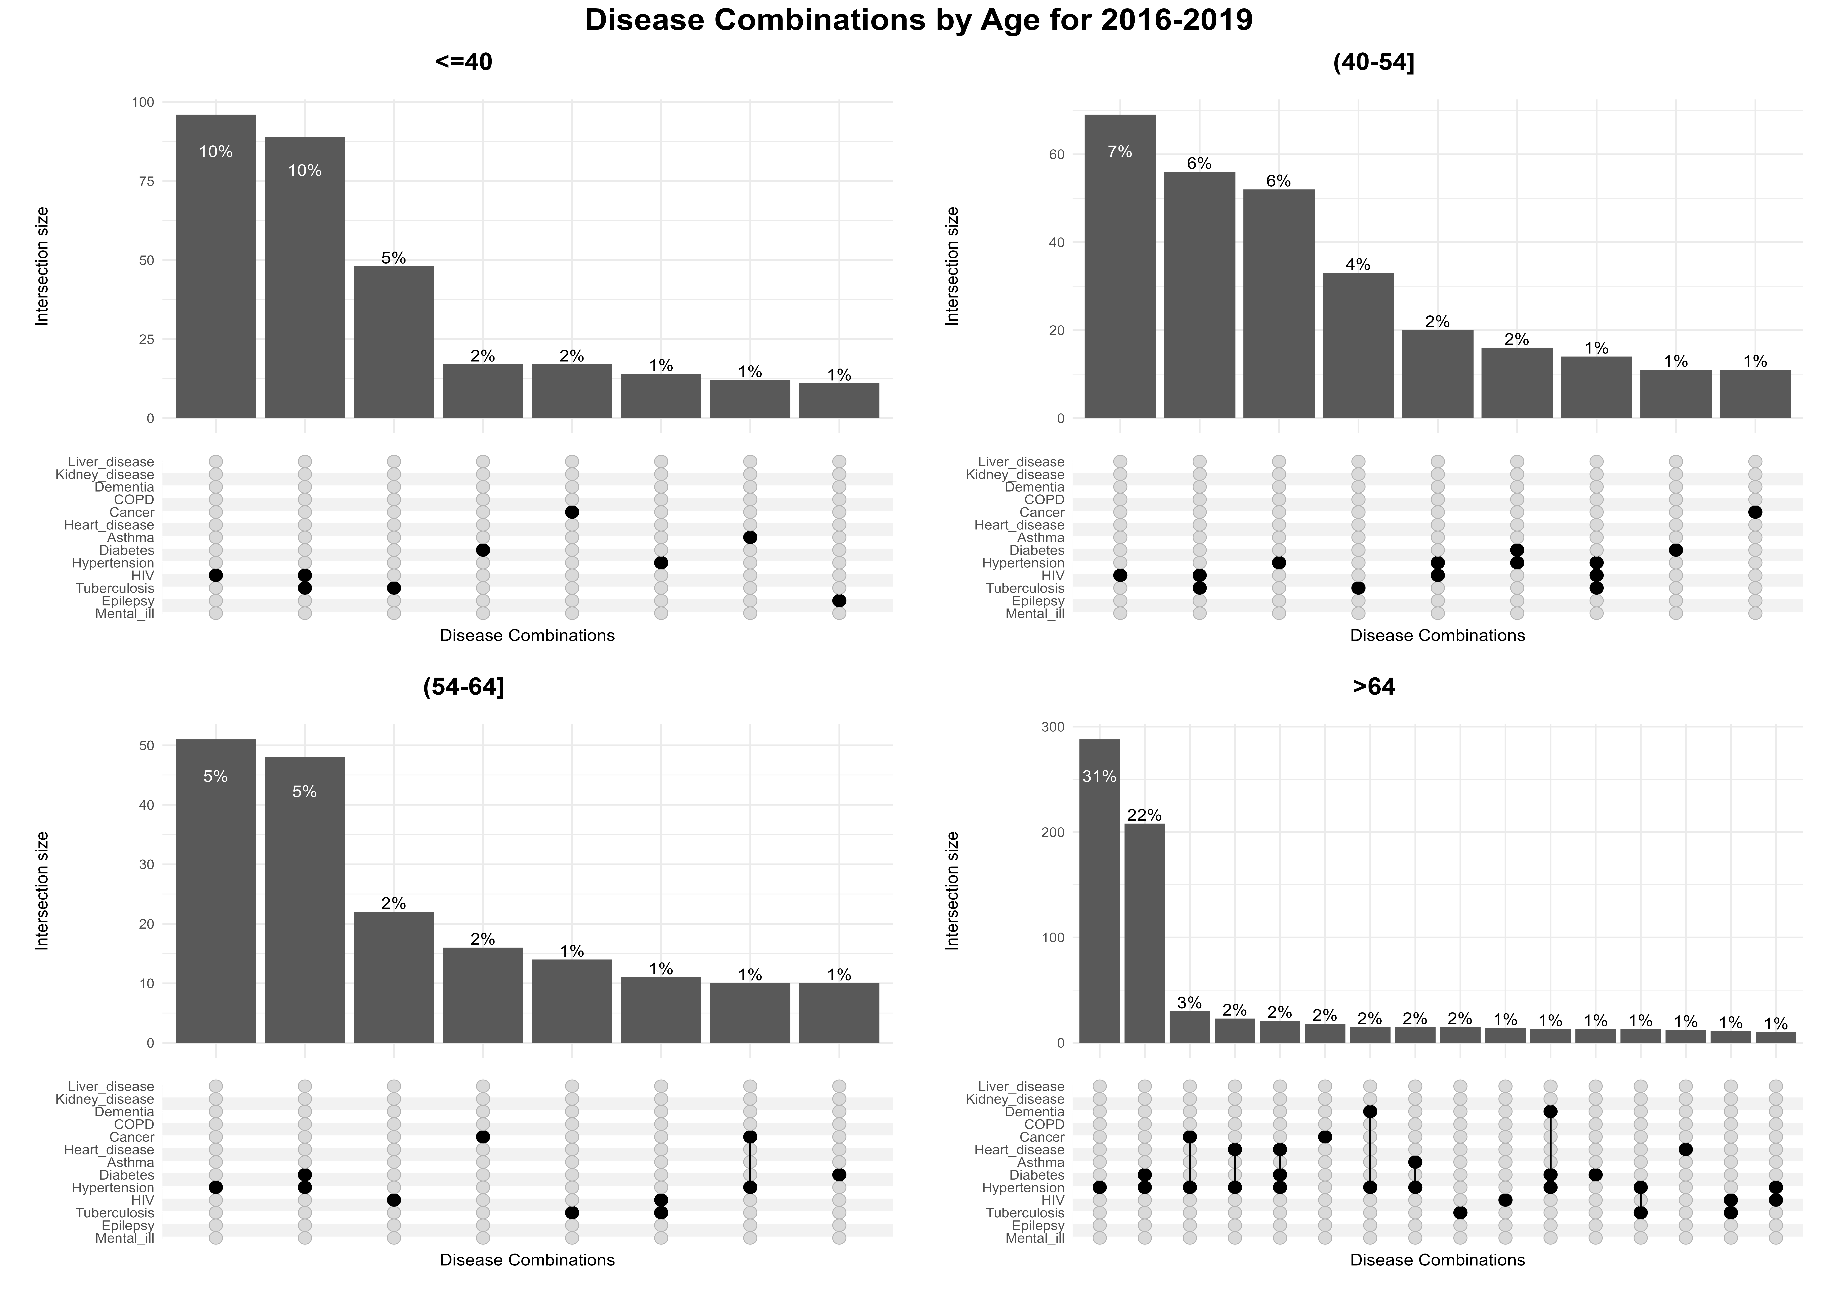
**

Figure SUP 7 b

**
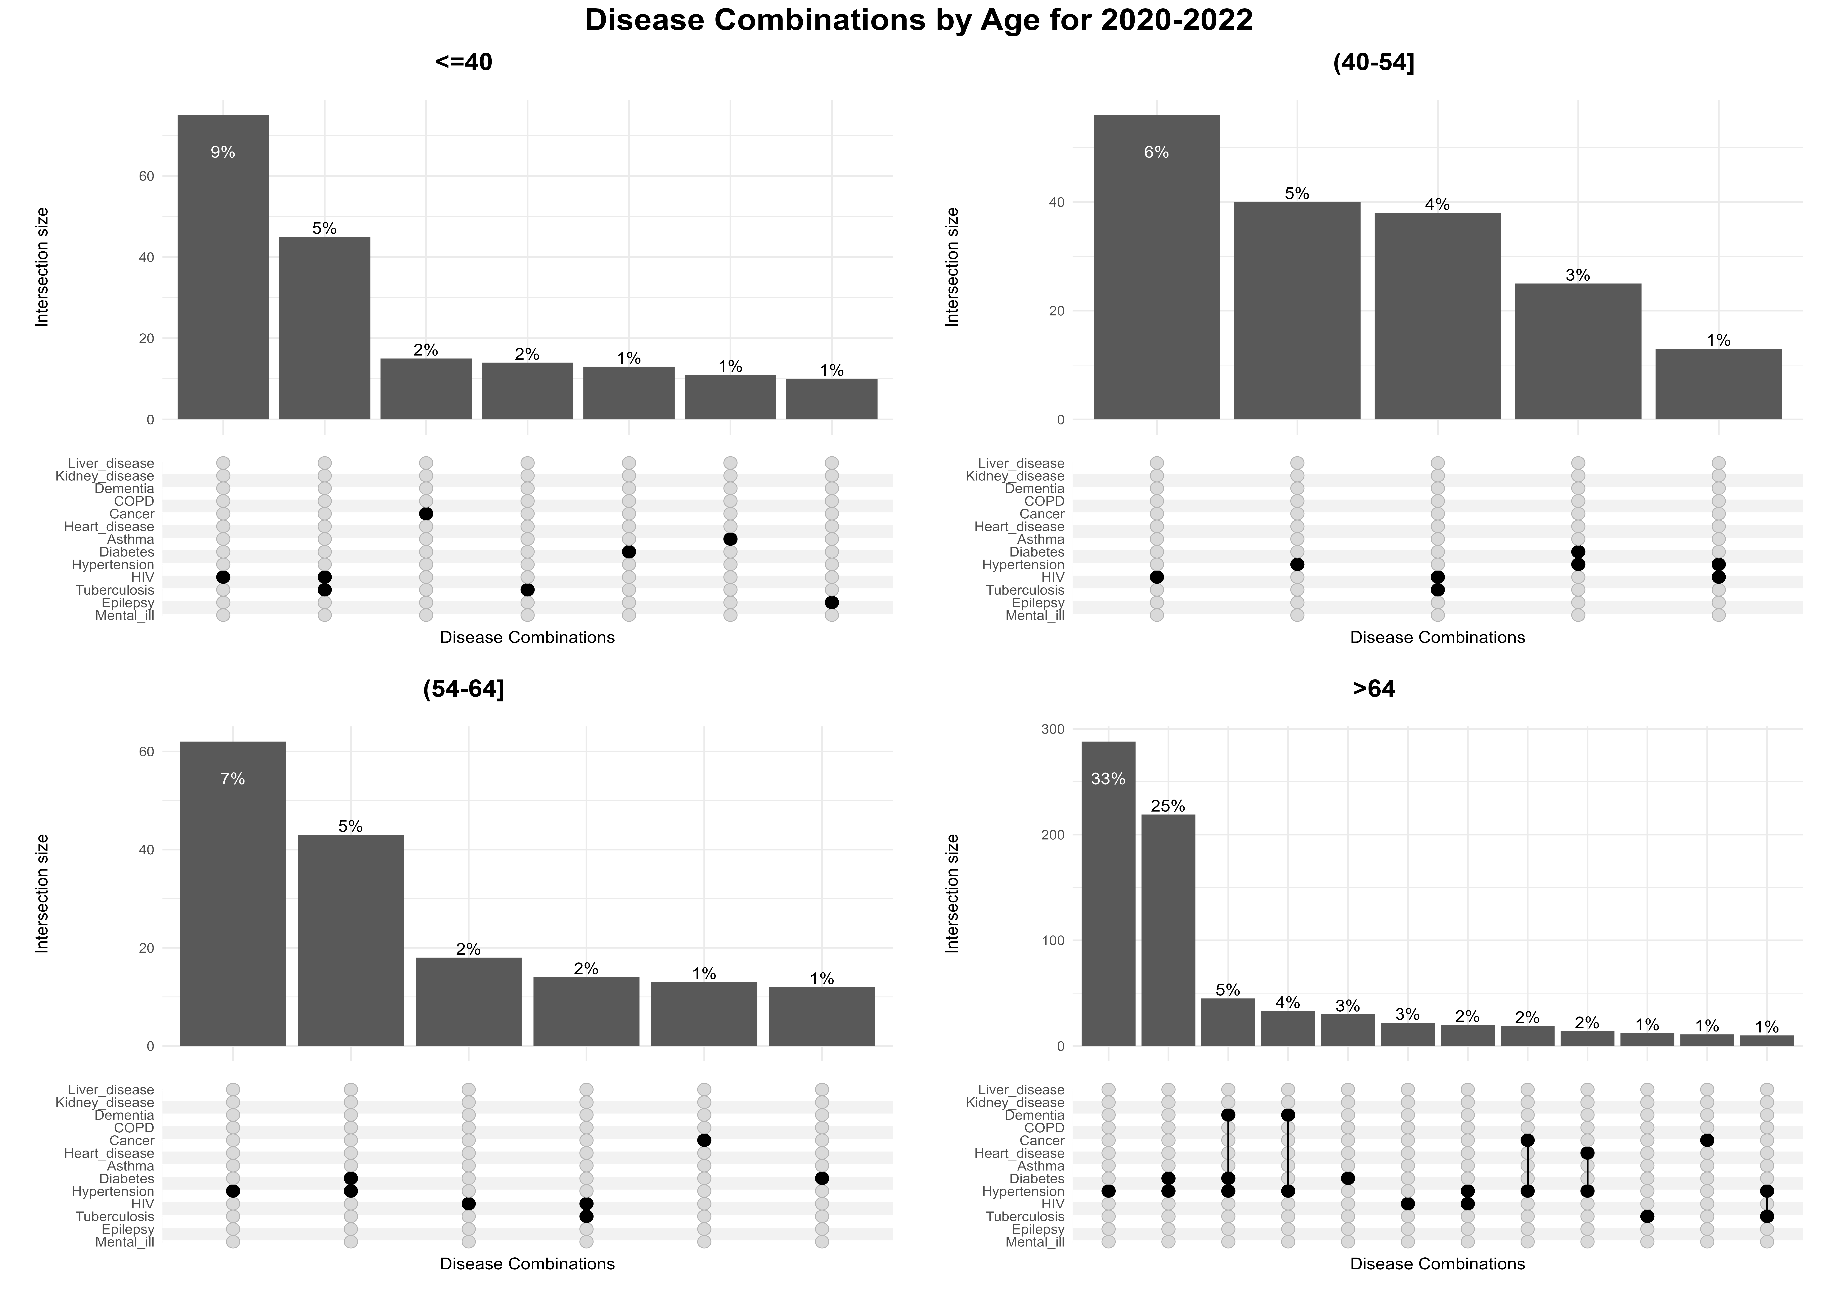
**

Figure SUP 7 c

**
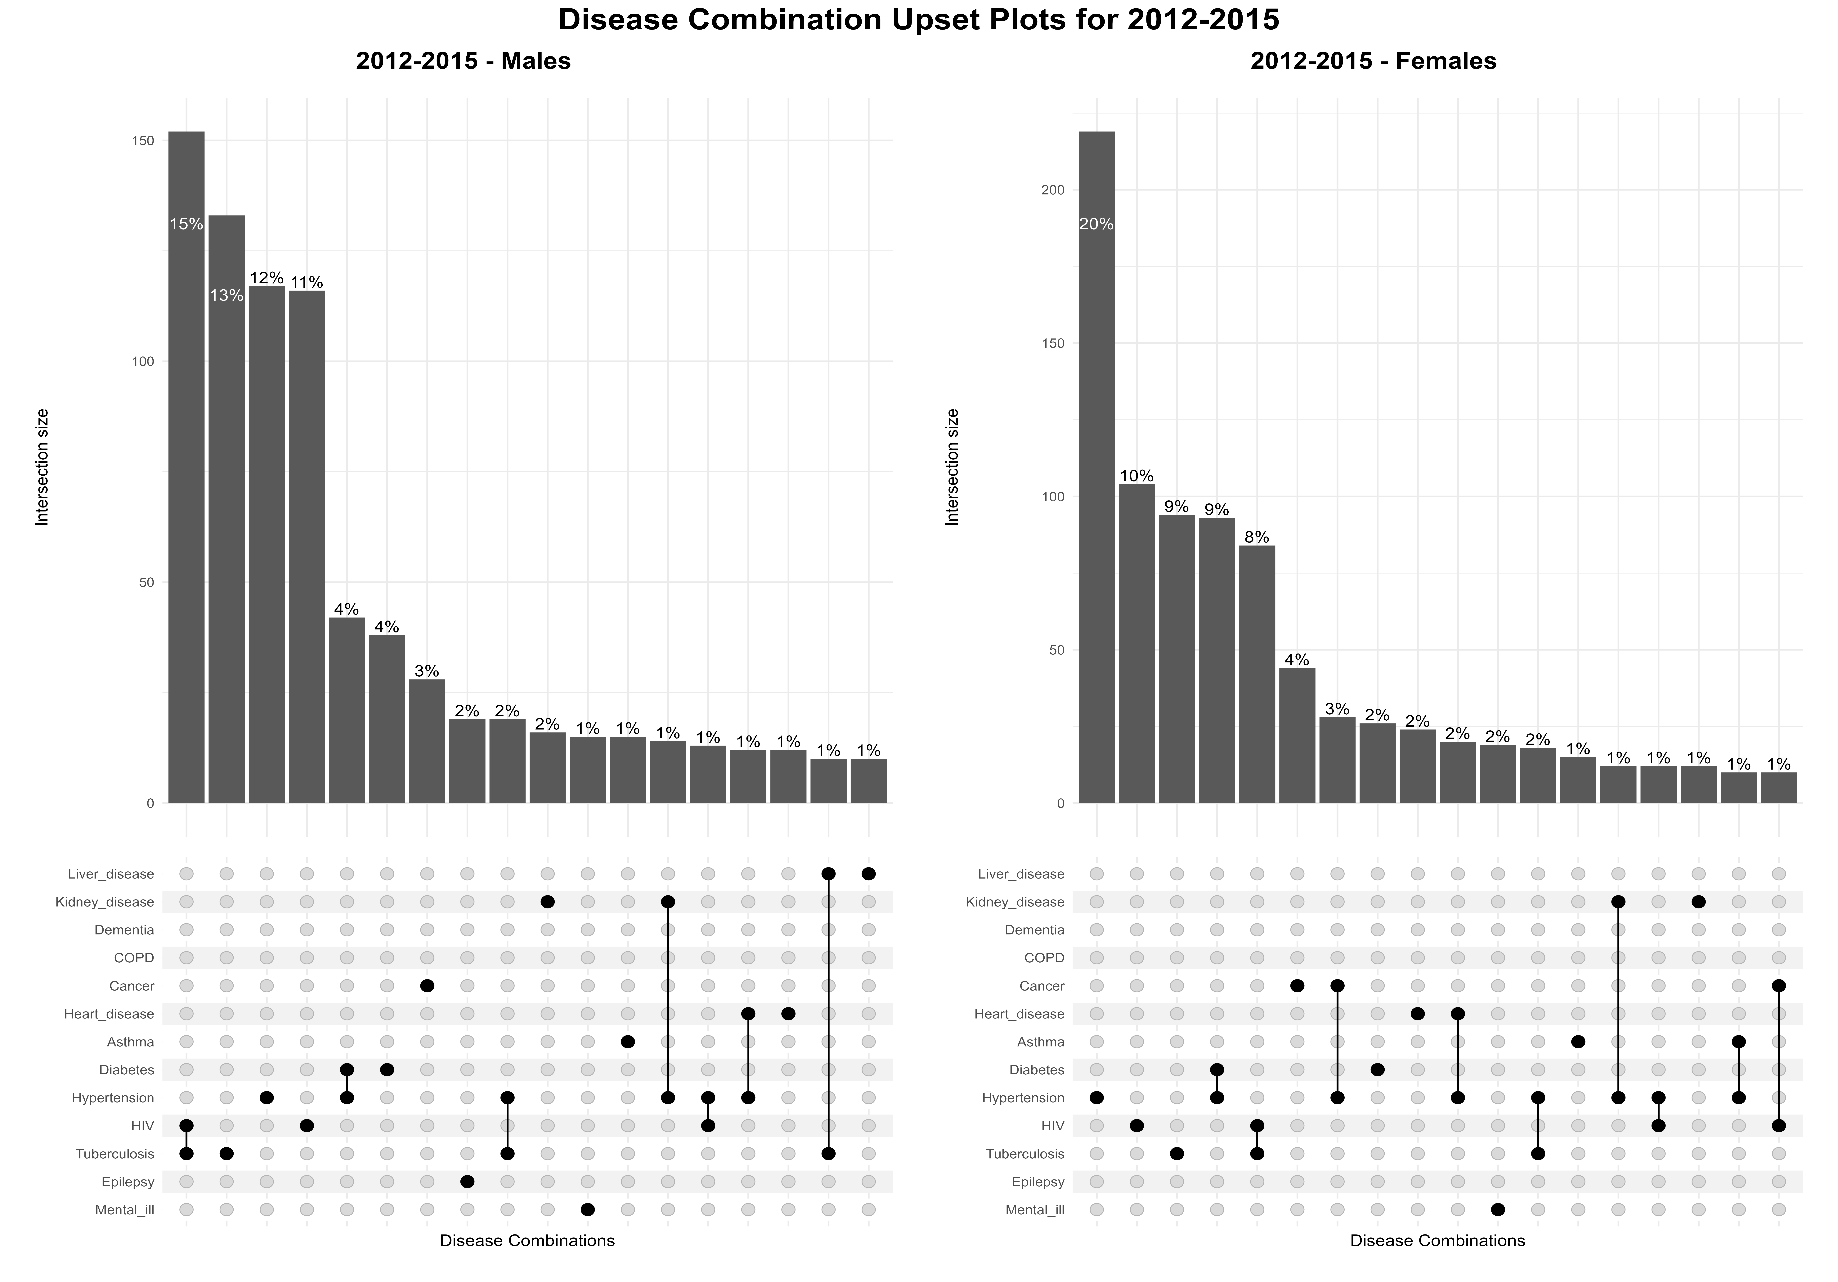
**

Figure SUP 8 a

**
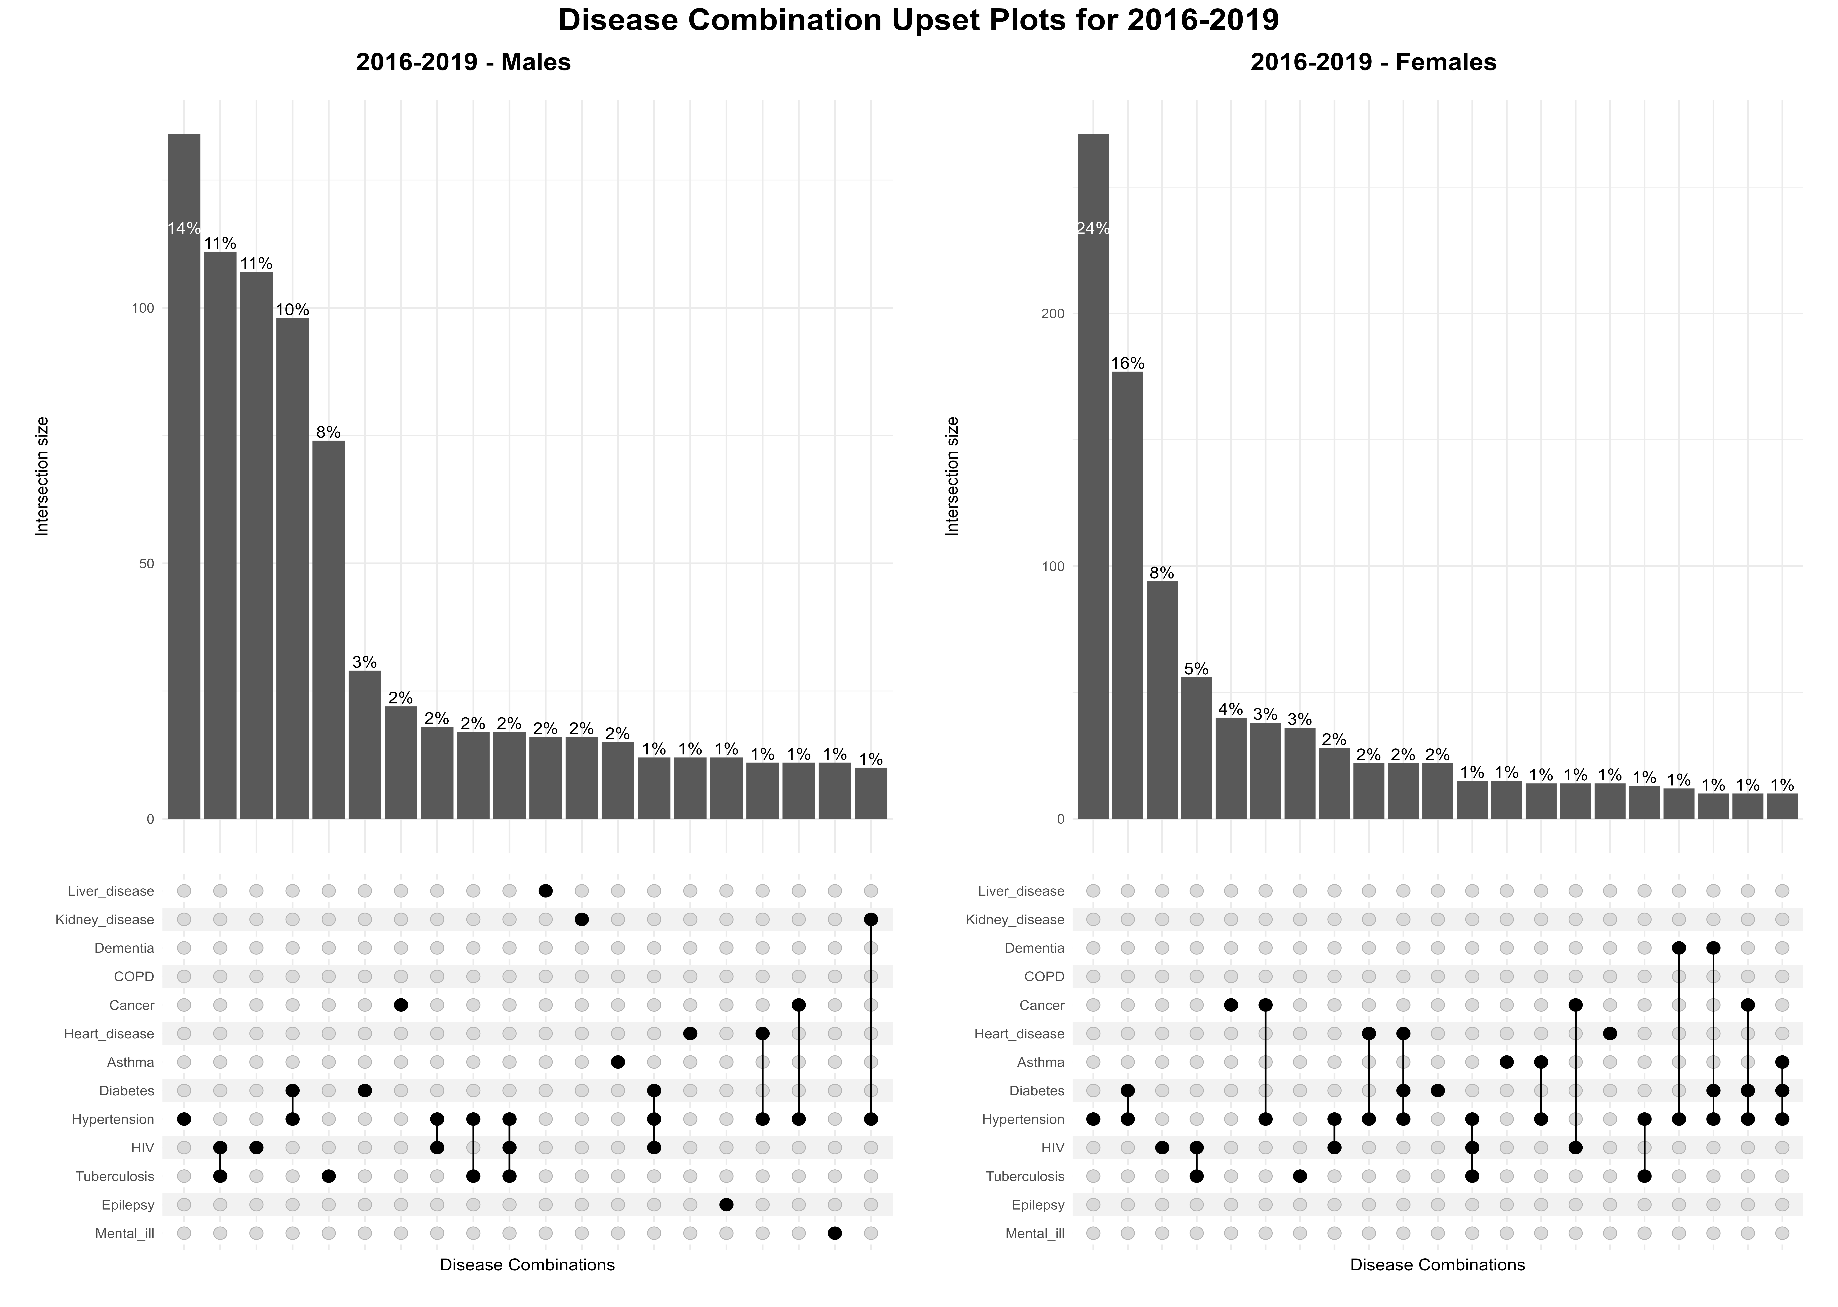
**

Figure SUP 8 b

**
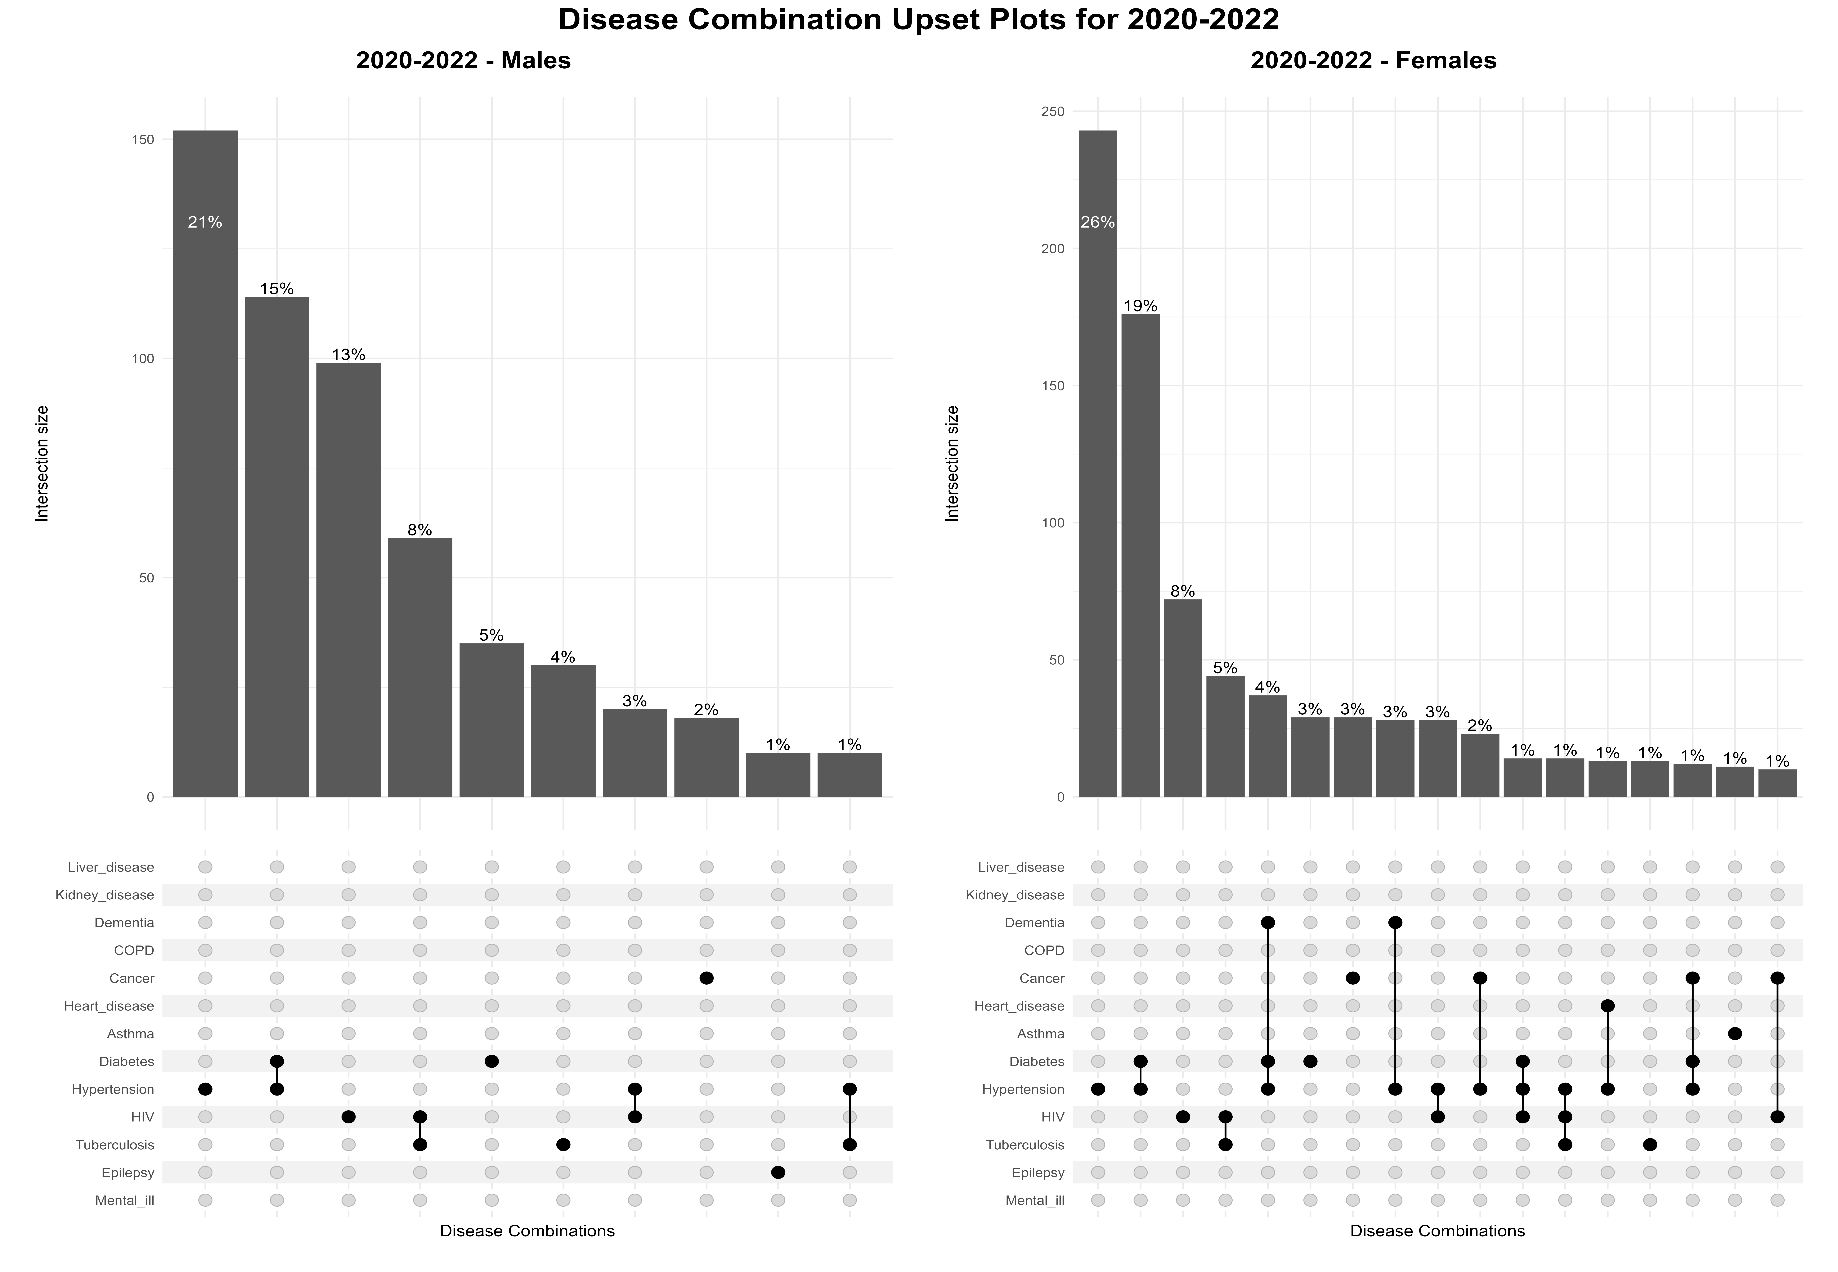
**

Figure SUP 8 c
